# Supplementary material for: A turtle population study in an isolated urban wetland complex in Ontario reveals a few surprises
Source: Atypon-hosted journal article supplement (doi:10.1139/facets-2019-0046), 2019-06-01
Supplement: facets-2019-0046_supplement1.csv [file facets-2019-0046_supplement1.csv]

Number	Date	Trap Type	Area		Location	Status	Species	Sex	Age	Weight (g)	Plastron(mm)	Carapace(mm)	Width (mm)	Body Depth (mm)	PCL (mm)	Nail/ MID PLASTRON	Notch no.	VHF/Vemco	PIT number	NOTES
	2014-08-05	Hoop	HLCA	HLCA	HLCA East	N	Painted	J	J	123.5	84.7	92.1	76.3	37.2	5.7		1
	2014-08-05	Hoop	HLCA	HLCA	HLCA East	N	Painted	J	J	85	76.3	82.4	71.6	34.2	3.5		2
	2014-08-05	Hoop	HLCA	HLCA	HLCA East	N	Painted	J	J	83	68.6	78.4	69.6	31.3	2.7		3
	2014-08-06	Net	HLCA	HLCA	HLCA East	N	Painted	J	J	152	92.4	101.1	82.7	37.5	6.1		4
	2014-08-07	Hoop	HLCA	HLCA	HLCA East	N	Painted	M	A	329	126.7	135.6	104.8	44.3	14.3		5
	2014-08-07	Hoop	HLCA	HLCA	HLCA East	N	Painted	M	A	156.5	93.8	104.9	81.4	36.1	17.4		6
	2014-08-07	Hoop	HLCA	HLCA	HLCA East	N	Painted	M	A	169.5	95.6	102.3	83.7	39.4	14	9.5	7
	2014-08-08	Hoop	HLCA	HLCA	HLCA East	N	Painted	M	A	204.5	103.7	113	90.9	39.8	15.9		8
	2014-08-08	Hoop	HLCA	HLCA	HLCA East	N	Painted	M	A	211.5	104.5	111.9	90.9	39.2	12.9		9
	2015-06-12	N/A	HLCA	HLCA	HLCA East	N	Snapping	F	A	4,615.40	201	270	223	79	50		1
	2015-06-12	N/A	HLCA	HLCA	HLCA East	N	Snapping	M	A	2,782.80	165	242	208	71	79		Not able to notch, no tool
	2015-06-16	Hoop	HLCA	HLCA	HLCA East	N	Painted	M	A	236	111	120	98	40	15	11	10
	2015-06-16	Hoop	HLCA	HLCA	HLCA East	N	Painted	M	A	281	114	129	99	44	19	13	11
	2015-06-16	Flag #8	HLCA	HLCA	HLCA East	N	Painted	F	A	551	150	162	119	57	8	8	12
	2015-06-16	Hoop	HLCA	HLCA	HLCA East	N	Painted	M	SA	75	71	78	69	30	5		13
	2015-06-25	Basking	HLCA	HLCA	HLCA East	N	Painted	M	A	245	109	118	99	42	13	13	14
	2015-06-25	Hoop	HLCA	HLCA	HLCA East	N	Painted	M	A	350	135	139	102	47	17	14	15
	2015-06-25	Hoop	HLCA	HLCA	HLCA East	N	Snapping	M	SA	249	70	99	90	53	32		3
	2015-07-09	Hoop Trap 3	HLCA	HLCA	HLCA East	R	Painted	M	A	171	98	108	84	37	18	14	6
	2015-07-09	Basking	HLCA	HLCA	HLCA East	N	Snapping	F	SA	278	77	101	92	51	25	mid-32	4
	2015-07-10	Hoop	HLCA	HLCA	HLCA East	N	Painted	J	J	100	79	87	76	33	5	4	16
	2015-07-15	Large Basking	HLCA	HLCA	HLCA East	N	Painted	M	A	194	97	109	89	39	10	11	17
	2015-07-22	Large Basking	HLCA	HLCA	HLCA East	R	Painted	M	A	263	116	134	96	39	20	13	11
	2015-08-05	Hoop	HLCA	HLCA	HLCA East	R	Snapping	F	SA	278	77	101	92	51	25		4
	2015-08-05	Hoop	HLCA	HLCA	HLCA East	N	Snapping	M	A	3,900.00	197	245	208	103	118	Mid-81	5
	2015-08-05	Hoop	HLCA	HLCA	HLCA East	N	Snapping	F	SA	1,112.00	111	159	140	62	48	Mid-54	6
	2015-08-06	Hoop	HLCA	HLCA	HLCA East	N	Painted	M	A	344	125.6	138.3	103	45	19	13	18
	2015-08-06	Hoop	HLCA	HLCA	HLCA East	N	Painted	M	A	331	127.3	138	108.8	44	13.7	14	19
	2015-08-06	Hoop	HLCA	HLCA	HLCA East	N	Painted	F	A	571	150.9	155	122	57.8	8.1	7	20
	2015-08-06	Hoop	HLCA	HLCA	HLCA East	N	Painted	M	A	286	118.6	129	102.7	43.3	14.2	13	21
	2015-08-06	Hoop	HLCA	HLCA	HLCA East	N	Painted	M	A	350	127.1	142.6	106.4	45.7	16.1	15	22
	2015-08-06	Hoop	HLCA	HLCA	HLCA East	N	Painted	M	A	300	120	131	103.4	42.8	14.1	15	23
	2015-08-06	Hoop	HLCA	HLCA	HLCA East	N	Painted	M	A	222	113.5	119.6	92.3	37.2	14.6	14	24
	2015-08-06	Hoop	HLCA	HLCA	HLCA East	N	Snapping	F	A	3,600.00	167	244	199	100	67.2	mid-80	** 20 (should be 7)
	2015-08-07	Hoop	HLCA	HLCA	HLCA East	N	Painted	J	J	30	51.4	54.8	53.5	20.3	3.7	3	Not able to notch too young
	2015-09-04	N/A	HLCA	HLCA	HLCA East	N	Painted	F	SA	192	104	107	83	30	7	6	25
	2015-09-15	Hoop	HLCA	HLCA	HLCA East	R	Painted	M	A	227							24
	2015-09-15	Basking	HLCA	HLCA	HLCA East	N	Painted	J	J	83	75	77.6	71.2	32.7	5.6	2	26
	2015-09-15	Basking	HLCA	HLCA	HLCA East	N	Painted	J	J	84	70.9	77.3	70.3	32.1	5.5	2	27
	2015-09-15	Hoop	HLCA	HLCA	HLCA East	N	Painted	F	A	713	167	175	127	58.8	7.2	9	28
	2015-09-15	Hoop	HLCA	HLCA	HLCA East	N	Painted	M	A	356	123.1	188.6	108.9	45.8	15.1	15	29
	2015-09-15	Hoop	HLCA	HLCA	HLCA East	N	Painted	M	A	260	115.5	125.3	100.1	41.5	14.3	14	30
	2015-09-15	Hoop	HLCA	HLCA	HLCA East	N	Painted	M	A	170	97.2	103.9	82.2	39.3	14.1	11	31
	2015-09-15	Hoop	HLCA	HLCA	HLCA East	N	Painted	M	A	350	126.5	139.4	109.2	46	18.6	16	32
	2015-09-15	Hoop	HLCA	HLCA	HLCA East	R	Painted	M	SA	213	107.2	116.9	93.3	39.6	16.6	15	8 - Recapture Modified Cagle Number
	2015-09-16	Basking	HLCA	HLCA	HLCA East	R	Painted	M	A							14	30
	2015-09-16	Hoop	HLCA	HLCA	HLCA East	N	Painted	M	A	331	26.5	136.7	107.1	45.4	13.9	13	33
	2016-07-18	Hand	HLCA	HLCA	HLCA East	N	Painted	J	HY	na	57	65	65	na	na	na	1
	2016-07-18	Hand	HLCA	HLCA	HLCA East	N	Painted	J	HY	na	59	69	65	na	na	na	2
	2016-07-18	Hand	HLCA	HLCA	HLCA East	N	Painted	J	HY	15	38	43	43	17	4	3	70
	2016-07-18	Hand	HLCA	HLCA	HLCA East	N	Painted	J	2	84	74	78	71	33	4	5	71
	2016-07-18	Hand	HLCA	HLCA	HLCA East	N	Painted	J	1	47	52	64	58	25	3	5	72
	2016-07-18	Hand	HLCA	HLCA	HLCA East	N	Snapping	M	SA	821	105	147	126	66	47	MPL48- extruded male genetalia	10
5	2018-05-29	Hoop	HLCA	Sandal	Sandal E	N	Painted	F	SA	436	136	146	112	46	5	3	50		EDBC
7	2018-05-29	Hoop	HLCA	Sandal	Sandal E	N	Painted	J	J	198	101	109	89	40	6	4	51		EFEA
6	2018-05-29	Hoop	HLCA	Sandal	Sandal E	N	Painted	F	A	464	140	147	110	52	5	5	52		B5C6
8	2018-05-29	Hoop	HLCA	Sandal	Sandal E	N	Painted	M	A	316	127	134	110	45	15	16	53		3D9239F87EECC
9	2018-05-29	Hoop	HLCA	Sandal	Sandal E	N	Painted	J	J	158	97	103	85	39	7	6	54		ABF3
10	2018-05-29	Hoop	HLCA	Sandal	Sandal E	N	Painted	M	SA	258	117	130	99	44	15	13	55		AB8E
11	2018-05-29	Hoop	HLCA	Sandal	Sandal E	N	Painted	M	A	280	114	130	90	42	15	9	56		EE38
12	2018-05-29	Hoop	HLCA	Sandal	Sandal E	N	Painted	F	SA	288	120	127	101	46	5	7	57		F87A
13	2018-05-29	Hoop	HLCA	Sandal	Sandal E	N	Painted	F	A	344	132	141	107	52	5	9	58		F4AA
14	2018-05-29	Hoop	HLCA	Sandal	Sandal E	N	Painted	M	A	182	100	110	92	39	14	11	59		EDEO
15	2018-05-29	Hoop	HLCA	Sandal	Sandal E	N	Painted	M	SA	262	118	129	98	38	12	9	60		EDAA
16	2018-05-29	Hoop	HLCA	Sandal	Sandal E	N	Painted	M	A	224	114	125	97	42	18	14	61		EEC2
17	2018-05-29	Hoop	HLCA	Sandal	Sandal E	N	Painted	F	SA	240	114	120	94	45	5	6	62		B177
4	2018-05-29	Hoop	HLCA	Sandal	Sandal E	N	Slider	F	A	750	148	170	130	57	8	4	11			Released
3	2018-05-29	Hoop	HLCA	Sandal	Sandal E	N	Slider	F	A	2120	200	210	190	100	12	9	100			Released
2	2018-05-29	Hoop	HLCA	Sandal	Sandal E	N	Snapping	J	J	358	78	110	94	40	26	35	21
1	2018-05-29	Hoop	HLCA	Sandal	Sandal E	N	Snapping	M	SA	2230	140	205	170	85	64	66	22			Tentative sexing
27	2018-05-30	Hoop	HLCA	Sandal	Sandal E	R	Painted	M	A	148	124	130	66	41	13	14	22		F7CC
25	2018-05-30	Hoop	HLCA	Sandal	Sandal E	R	Painted	F	A	148	128	135	66	51	5	7	35		3D9.239F87AFBF
22	2018-05-30	Hoop	HLCA	Sandal	Sandal E	N	Painted	M	A	286	125	130	70	41	11	10	63		3D9.239F87EE84
23	2018-05-30	Hoop	HLCA	Sandal	Sandal E	N	Painted	F	A	232	138	144	71	49	3	7	64		3D9.239F87F7C9
24	2018-05-30	Hoop	HLCA	Sandal	Sandal E	N	Painted	F	A	244	147	155	121	52	7	7	65		B4O4
26	2018-05-30	Hoop	HLCA	Sandal	Sandal E	N	Painted	F	A	258	145	155	70	41	3	4	66			GRAVID NO PIT
28	2018-05-30	Hoop	HLCA	Sandal	Sandal E	N	Painted	M	A	118	127	140	66	42	13	14	67		3D9239F87AEEF
29	2018-05-30	Hoop	HLCA	Sandal	Sandal E	N	Painted	J	J	116	111	119	57	45	4	6	68		F8A2
30	2018-05-30	Hoop	HLCA	Sandal	Sandal E	N	Painted	F	A	158	119	126	61	45	3	4	69		B01E
31	2018-05-30	Hoop	HLCA	Sandal	Sandal E	N	Painted	M	A	108	109	122	58	39	13	12	70		AFA3
32	2018-05-30	Hoop	HLCA	Sandal	Sandal E	N	Painted	M	A	112	119	121	60	38	10	12	71		EEBF	NOTCHED AS 40,20,10,1 INSTEAD OF 70,1
33	2018-05-30	Hoop	HLCA	Sandal	Sandal E	N	Painted	M	SA	74	113	121	57	37	10	10	72		EFOB
34	2018-05-30	Hoop	HLCA	Sandal	Sandal E	N	Painted	J	J	74	100	119	50	35	7	7	73		B148
35	2018-05-30	Hoop	HLCA	Sandal	Sandal E	N	Painted	J	J	100	87	94	48	34	3	3	74		B183
36	2018-05-30	Hoop	HLCA	Sandal	Sandal E	N	Painted	J	J	68	96	103	51	32	3	3	75		F891
18	2018-05-30	Hoop	HLCA	Sandal	Sandal E	N	Snapping	F	A	4100	170	246	208	105	65	81	23			GRAVID-NO PIT
19	2018-05-30	Hoop	HLCA	Sandal	Sandal E	N	Snapping	F	SA	1468	120	165	150	88	40	49	24
20	2018-05-30	Hoop	HLCA	Sandal	Sandal E	N	Snapping	F	SA	1302	130	170	141	65	49	57	25		3DD.003BCFAA29
21	2018-05-30	Hoop	HLCA	Sandal	Sandal E	N	Snapping	M	SA	926	114	152	130	63	44	52	26		3DD.003BCFAA17	EXTRUDED
48	2018-05-31	Hoop	HLCA	Sandal	Sandal E	R	Painted										35
47	2018-05-31	Hoop	HLCA	Sandal	Sandal E	R	Painted										57
49	2018-05-31	Hoop	HLCA	Sandal	Sandal E	R	Painted										64
53	2018-05-31	Hoop	HLCA	Sandal	Sandal E	R	Painted										70
51	2018-05-31	Hoop	HLCA	Sandal	Sandal E	R	Painted										72
50	2018-05-31	Hoop	HLCA	Sandal	Sandal E	R	Painted										75
38	2018-05-31	Hoop	HLCA	Sandal	Sandal E	N	Painted	F	SA	341	123	132	101	51	4	8	76		F6D4
39	2018-05-31	Hoop	HLCA	Sandal	Sandal E	N	Painted	F	SA	356	129	139	110	47	7	7	77		F410
40	2018-05-31	Hoop	HLCA	Sandal	Sandal E	N	Painted	M	A	235	114	124	93	41	13	16	78		AFEC
41	2018-05-31	Hoop	HLCA	Sandal	Sandal E	N	Painted	J	J	171	100	106	87	37	6	6	79		EF04
42	2018-05-31	Hoop	HLCA	Sandal	Sandal E	N	Painted	J	J	166	97	106	85	40	9	8	80		F42F
43	2018-05-31	Hoop	HLCA	Sandal	Sandal E	N	Painted	M	A	222	109	119	92	41	14	14	81		F3E2
52	2018-05-31	Hoop	HLCA	Sandal	Sandal E	N	Painted	M	SA	264	111	125	104	45	16	12	82		AA2A
54	2018-05-31	Hoop	HLCA	Sandal	Sandal E	N	Painted	M	SA	170	94	104	87	38	12	11	83		AA50
56	2018-05-31	Hoop	HLCA	Sandal	Sandal E	N	Painted	M	A	350	130	140	95	45	13	14	84		B682
57	2018-05-31	Hoop	HLCA	Sandal	Sandal E	N	Painted	M	A	448	140	150	110	50	17	14	85		F0F5
58	2018-05-31	Hoop	HLCA	Sandal	Sandal E	N	Painted	M	A	337	134	148	105	48	15	13	86		F4SA
60	2018-05-31	Hoop	HLCA	Sandal	Sandal E	N	Painted	M	A	315	124	134	102	45	14	14	87		F85F
62	2018-05-31	Hoop	HLCA	Sandal	Sandal E	N	Painted	M	A	294	120	135	100	40	17	11	88		F2D5	tumour growth both sides of head
63	2018-05-31	Hoop	HLCA	Sandal	Sandal E	N	Painted	F	SA	323	122	132	101	47	11	7	89		ADSC	DIFFICULTY SEXING
64	2018-05-31	Hoop	HLCA	Sandal	Sandal E	N	Painted	M	SA	210	113	123	94	42	17	12	90		B3E6
65	2018-05-31	Hoop	HLCA	Sandal	Sandal E	N	Painted	M	SA	349	135	146	104	48	15	15	91		B132
55	2018-05-31	Hoop	HLCA	Sandal	Sandal E	N	Painted	F	SA	233	109	120	100	44	11	3	NA		AB90	NOT NOTCHED
37	2018-05-31	Hoop	HLCA	Sandal	Sandal E	R	Snapping										24
44	2018-05-31	Hoop	HLCA	Sandal	Sandal E	N	Snapping	F	A	4800	189	267	232	120	75	93	27		AA55
45	2018-05-31	Hoop	HLCA	Sandal	Sandal E	N	Snapping	M	A	10100	244	355	297	150	174	115	28		AA3A
46	2018-05-31	Hoop	HLCA	Sandal	Sandal E	N	Snapping	J	J	1995	142	210	170	80	61	69	29		AA31
61	2018-05-31	Hoop	HLCA	Sandal	Sandal E	N	Snapping	F	SA	2900	158	219	181	96	56	71	30		AA4D
59	2018-05-31	Hoop	HLCA	Sandal	Sandal E	N	Snapping	M	A	9900	264	356	303	140	162	119	80		AA18	MISNOTCHED (SHOULD HAVE BEEN 30)
66	2018-06-01	Hoop	HLCA	Sandal	Sandal E	R	Painted		J								68		F8A2
67	2018-06-01	Hoop	HLCA	Sandal	Sandal E	R	Painted	M	A								85		F0F5
68	2018-06-01	Hoop	HLCA	Sandal	Sandal E	N	Painted	F	SA	232	104	116	91	41	3	3	92		F189
69	2018-06-01	Hoop	HLCA	Sandal	Sandal E	N	Painted	M	SA	232	107	119	94	37	11	10	93		F2A8
70	2018-06-01	Hoop	HLCA	Sandal	Sandal E	N	Painted	M	SA	172	94	100	85	37	10	9	94		F33F
71	2018-06-01	Hoop	HLCA	Sandal	Sandal E	N	Painted	M	A	312	117	128	102	41	11	11	95		B1FB
73	2018-06-01	Hoop	HLCA	Sandal	Sandal E	N	Painted	J	J	182	98	104	84	36	4	3	96		F2E7
74	2018-06-01	Hoop	HLCA	Sandal	Sandal E	N	Painted	F	A	504	144	150	115	51	4	4	97		AA2D
72	2018-06-01	Hoop	HLCA	Sandal	Sandal E	R	Snapping										25
75	2018-06-01	Hoop	HLCA	Sandal	Sandal E	N	Snapping	F	A	7270	226	303	250	133	62	116	30		AA6C
79	2018-06-05	Hoop	HLCA	Sandal	Sandal E	R	Painted	M	A	267	123	132	101	41	17	15	60		EDAA
77	2018-06-05	Hoop	HLCA	Sandal	Sandal E	N	Painted	F	A	565	153	165	121	59	6	7	98		3DD.003BCFAA30
78	2018-06-05	Hoop	HLCA	Sandal	Sandal E	N	Painted	M	A	291	121	132	103	48	18	14	99		F3C3
80	2018-06-05	Hoop	HLCA	Sandal	Sandal E	N	Painted	F	A	502	140	155	120	56	7	6	100		3DD.003BCFAA68
81	2018-06-05	Hoop	HLCA	Sandal	Sandal E	N	Painted	M	A	294	122	134	102	41	16	14	101		F232
82	2018-06-05	Hoop	HLCA	Sandal	Sandal E	N	Painted	F	A	636	155	160	125	60	4	7	102		GRAVID NOT NOTCHED
83	2018-06-05	Hoop	HLCA	Sandal	Sandal E	N	Painted	J	J	240	110	124	98	44	4	3	103		AC26
86	2018-06-05	Hoop	HLCA	Sandal	Sandal E	R	Slider	F	A								100
76	2018-06-05	Hoop	HLCA	Sandal	Sandal E	N	Snapping	F	A	5700	242	307	249	130	85	110	31		3DD.003BCFAA5E
84	2018-06-05	Hoop	HLCA	Sandal	Sandal E	N	Snapping	J	J	985	118	160	140	75	45	52	32		3DD.003BCFAA2E
85	2018-06-05	Hoop	HLCA	Sandal	Sandal E	R	Snapping	M	A	9900							80		AA18
87	2018-06-06	Hoop	HLCA	Sandal	Sandal E	N	Snapping	M	SA	3740	167	248	206	97	96	75	33		AA4B
90	2018-06-07	Hoop	HLCA	Sandal	Sandal E	R	Painted	M	SA								63		EE84
89	2018-06-07	Hoop	HLCA	Sandal	Sandal E	R	Painted	M	A								75		F0F5
91	2018-06-07	Hoop	HLCA	Sandal	Sandal E	N	Painted	J	J	250	109	112	92	44	4	3	104		B19E
92	2018-06-07	Hoop	HLCA	Sandal	Sandal E	N	Painted	M	A	302	121	135	103	45	16	13	105		F264
93	2018-06-07	Hoop	HLCA	Sandal	Sandal E	N	Painted	M	A	318	132	140	103	44	17	15	106		AE11
94	2018-06-07	Hoop	HLCA	Sandal	Sandal E	N	Painted	J	J	224	113	120	93	44	3	3	107		F1DD
95	2018-06-07	Hoop	HLCA	Sandal	Sandal E	N	Painted	M	A	198	109	117	89	38	18	15	108		EDFB
88	2018-06-07	Hoop	HLCA	Sandal	Sandal E	R	Snapping	M	SA								33		AA4B
96	2018-06-07	Hoop	HLCA	Sandal	Sandal E	N	Snapping	M	SA	5300	184	270	226	115	105	90	34		AA66
202	2018-06-07	Hand	HLCA	Lake	HLE	DEAD	Snapping	M	A	11550	280	367	305	142	159	126	NN			FOUND DEAD, NO WOUNDS
97	2018-06-08	Hoop	HLCA	Sandal	Sandal E	N	Painted	M	A	194	110	119	90	40	15	14	109		F5B9
98	2018-06-08	Hoop	HLCA	Sandal	Sandal E	N	Painted	J	J	185	100	106	90	38	7	7	110		F6AD
99	2018-06-08	Hoop	HLCA	Sandal	Sandal E	N	Snapping	J	SA	2430	147	215	174	95	67	66	35		AA4F
100	2018-06-08	Hoop	HLCA	Sandal	Sandal E	N	Snapping	F	SA	2500	155	216	182	91	54	72	36		AA64
118	2018-06-12	Hoop	HLCA	Lake	HLN	N	Painted	F	A	404	140	148	111	53	8	6	111		NO PIT
123	2018-06-12	Hoop	HLCA	Lake	HLN	N	Painted	F	SA	282	120	125	97	49	9	6	112		5C82
124	2018-06-12	Hoop	HLCA	Lake	HLN	N	Painted	M	SA	162	99	106	87	40	12	11	113		NO PIT
125	2018-06-12	Hoop	HLCA	Lake	HLN	N	Painted	F	A	318	125	133	102	48	6	8	114		NO PIT
126	2018-06-12	Hoop	HLCA	Lake	HLN	N	Painted	F	A	452	140	149	110	60	9	9	115		2C4O
127	2018-06-12	Hoop	HLCA	Lake	HLN	N	Painted	M	A	302	126	140	101	47	19	16	116		292B
128	2018-06-12	Hoop	HLCA	Lake	HLN	N	Painted	M	A	388	127	145	103	42	20	15	117		1AD8
129	2018-06-12	Hoop	HLCA	Lake	HLN	N	Painted	J	J	204	109	113	90	43	7	6	118		NO PIT
130	2018-06-12	Hoop	HLCA	Lake	HLN	N	Painted	F	A	560	149	155	118	63	5	8	119		7B97
131	2018-06-12	Hoop	HLCA	Lake	HLN	N	Painted	M	A	164	101	109	87	37	13	11	120		NO PIT
132	2018-06-12	Hoop	HLCA	Lake	HLN	N	Painted	M	A	212	114	124	90	39	21	16	121		5197
133	2018-06-12	Hoop	HLCA	Lake	HLN	N	Painted	F	SA	298	124	130	100	46	5	6	122		8I49
134	2018-06-12	Hoop	HLCA	Lake	HLN	N	Painted	J	J	168	103	109	89	39	6	6	123		NO PIT
135	2018-06-12	Hoop	HLCA	Lake	HLN	N	Painted	F	A	540	150	160	124	63	8	7	124		9176
136	2018-06-12	Hoop	HLCA	Lake	HLN	N	Painted	M	A	172	104	112	93	38	16	14	125		NO PIT
137	2018-06-12	Hoop	HLCA	Lake	HLN	N	Painted	M	A	288	120	129	101	39	15	14	126		74B9
151	2018-06-12	Hoop	HLCA	Lake	HLN	N	Painted	M	SA	180	102	111	87	39	15	13	127		NO PIT
152	2018-06-12	Hoop	HLCA	Lake	HLN	N	Painted	J	J	169	100	108	84	40	6	6	128		NO PIT
153	2018-06-12	Hoop	HLCA	Lake	HLN	N	Painted	M	SA	186	106	114	88	39	16	19	129		NO PIT
154	2018-06-12	Hoop	HLCA	Lake	HLN	N	Painted	M	SA	162	103	104	83	36	16	12	130		NO PIT
155	2018-06-12	Hoop	HLCA	Lake	HLN	N	Painted	M	SA	180	103	113	89	39	14	13	131		NO PIT
156	2018-06-12	Hoop	HLCA	Lake	HLN	N	Painted	M	A	234	113	126	97	38	15	14	132		64O9
157	2018-06-12	Hoop	HLCA	Lake	HLN	N	Painted	M	SA	244	114	124	96	44	14	12	133		98F8	BULGE ON HEAD
158	2018-06-12	Hoop	HLCA	Lake	HLN	N	Painted	F	SA	292	125	135	105	40	9	6	134		2DB2
159	2018-06-12	Hoop	HLCA	Lake	HLN	N	Painted	F	SA	298	122	130	101	48	8	8	135		9773
160	2018-06-12	Hoop	HLCA	Lake	HLN	N	Painted	F	A	360	121	133	99	51	6	4	136		NO PIT
161	2018-06-12	Hoop	HLCA	Lake	HLN	N	Painted	F	A	408	139	143	110	50	7	8	137		320F
162	2018-06-12	Hoop	HLCA	Lake	HLN	N	Painted	M	A	282	127	137	98	45	20	15	138		969A
163	2018-06-12	Hoop	HLCA	Lake	HLN	N	Painted	M	A	256	112	124	95	58	16	10	139		86OO
164	2018-06-12	Hoop	HLCA	Lake	HLN	N	Painted	F	A	324	142	158	118	39	9	7	140		98F9
165	2018-06-12	Hoop	HLCA	Lake	HLN	N	Painted	F	A	550	154	160	110	60	7	8	141		8A98
166	2018-06-12	Hoop	HLCA	Lake	HLN	N	Painted	F	A	468	140	150	110	55	14	5	142		80DE
115	2018-06-12	Hoop	HLCA	Lake	HLN	N	Slider	F	A	1500	193	198	160	88	14	12	12		AA59
167	2018-06-12	Hoop	HLCA	Lake	HLN	N	Slider	F	A	2070							13		NO PIT
168	2018-06-12	Hoop	HLCA	Lake	HLN	N	Slider	F	A	1676							14		NO PIT
101	2018-06-12	Hoop	HLCA	Lake	HLN	N	Snapping	M	A	9200	237	342	297	129	142	110	37		AA6B
102	2018-06-12	Hoop	HLCA	Lake	HLN	N	Snapping	M	A	12410	263	374	390	153	149	124	38		AA46
103	2018-06-12	Hoop	HLCA	Lake	HLN	N	Snapping	F	SA	4850	170	277	226	119	80	95	39		AA42
104	2018-06-12	Hoop	HLCA	Lake	HLN	N	Snapping	M	SA	5680	207	280	254	122	107	95	40		AA1C
105	2018-06-12	Hoop	HLCA	Lake	HLN	N	Snapping	M	A	10250	269	361	298	180	145	120	41		AA27
106	2018-06-12	Hoop	HLCA	Lake	HLN	N	Snapping	M	A	9750	256	345	304	134	146	117	42		AA58
107	2018-06-12	Hoop	HLCA	Lake	HLN	N	Snapping	J	J	1138	117	160	140	70	51	57	43		AA48
108	2018-06-12	Hoop	HLCA	Lake	HLN	N	Snapping	F	SA	2086	154	200	175	90	54	67	44		AA53
109	2018-06-12	Hoop	HLCA	Lake	HLN	N	Snapping	M	A	6600	225	304	256	128	137	119	45		AA54
110	2018-06-12	Hoop	HLCA	Lake	HLN	N	Snapping	F	A	6500	237	314	242	130	58	116	46	PP-240 2245, CODE 11, M12055	AA72
112	2018-06-12	Hoop	HLCA	Lake	HLN	N	Snapping	F	SA	3700	177	243	207	106	66	80	47		AA65
113	2018-06-12	Hoop	HLCA	Lake	HLN	N	Snapping	M	SA	3000	172	225	204	101	73	73	48	AA36	AA36	DISPLAYED
114	2018-06-12	Hoop	HLCA	Lake	HLN	N	Snapping	F	A	4100	208	264	221	118	52	98	49		AA47
117	2018-06-12	Hoop	HLCA	Lake	HLN	N	Snapping	F	SA	1174	122	152	142	75	45	56	50		AA64
119	2018-06-12	Hoop	HLCA	Lake	HLN	N	Snapping	F	A	6900	240	312	244	125	72	105	51	CODE 13, MFT-3A-M12057, PP240-2248	AA20
120	2018-06-12	Hoop	HLCA	Lake	HLN	N	Snapping	M	A	11000	260	350	294	140	179	114	52		AA2F
122	2018-06-12	Hoop	HLCA	Lake	HLN	N	Snapping	M	A	14100	313	412	346	201	173	134	54		AA4C
121	2018-06-12	Hoop	HLCA	Lake	HLN	N	Snapping	F	A	7000	234	321	285	129	80	105	55		AA63
138	2018-06-12	Hoop	HLCA	Lake	HLN	N	Snapping	F	A	5200	193	270	228	113	60	86	55		AA95
139	2018-06-12	Hoop	HLCA	Lake	HLN	N	Snapping	M	A	11900	266	353	323	152	150	120	56		AA69
140	2018-06-12	Hoop	HLCA	Lake	HLN	N	Snapping	F	A	6900	249	357	301	129	75	115	57	PP24-2246, CODE 15, MFT-A4-M12059	GRAVID-
141	2018-06-12	Hoop	HLCA	Lake	HLN	N	Snapping	J	J	912	115	165	139	67	42	56	58		AA3F
142	2018-06-12	Hoop	HLCA	Lake	HLN	N	Snapping	F	A	7400	251	313	280	131	60	121	59		AA3C
116	2018-06-12	Hoop	HLCA	Lake	HLN	R	Snapping	F	SA	2236	148	195	183	96	58	73	60		3BC.000056628B	RECAPTURED From OTTC rehab AS #20 (we notched her in parking lot), RENOTCHED AS #60
143	2018-06-12	Hoop	HLCA	Lake	HLN	N	Snapping	F	SA	4100	196	255	223	110	65	86	61		AA49
144	2018-06-12	Hoop	HLCA	Lake	HLN	N	Snapping	F	SA	3500	190	233	203	116	50	85	62		AA70
145	2018-06-12	Hoop	HLCA	Lake	HLN	N	Snapping	M	A	11900	286	379	330	153	168	122	63		AA4A
146	2018-06-12	Hoop	HLCA	Lake	HLN	N	Snapping	M	A	7000	224	316	277	131	130	105	64		AA33
147	2018-06-12	Hoop	HLCA	Lake	HLN	N	Snapping	M	A	5500	219	297	244	126	119	96	65		AA62
148	2018-06-12	Hoop	HLCA	Lake	HLN	N	Snapping	M	SA	3400	174	253	207	99	92	75	66		AA1B
149	2018-06-12	Hoop	HLCA	Lake	HLN	N	Snapping	F	SA	2600	155	222	182	97	64	71	67		AA52
150	2018-06-12	Hoop	HLCA	Lake	HLN	N	Snapping	M	SA	3800	173	250	205	104	105	78	68		AA57
111	2018-06-12	Hoop	HLCA	Lake	HLN	N	Snapping	M	A	12200	251	370	321	153	165	119	NN		AA43	RELEASED BEFORE NOTCHED
170	2018-06-13	Hoop	HLCA	Lake	HLN	R	Painted										126
179	2018-06-13	Hoop	HLCA	Lake	HLN	R	Painted	M									129		NO PIT
171	2018-06-13	Hoop	HLCA	Lake	HLN	N	Painted	M	A	178	102	115	90	39	16	14	141		AF0B
172	2018-06-13	Hoop	HLCA	Lake	HLN	N	Painted	F	A	252	116	121	100	45	9	7	142		F398	GROWTH ON NECK
173	2018-06-13	Hoop	HLCA	Lake	HLN	N	Painted	F	SA	238	112	120	91	45	7	6	143		186F
176	2018-06-13	Hoop	HLCA	Lake	HLN	N	Painted	F	A	372	135	143	106	52	9	7	144		043A
177	2018-06-13	Hoop	HLCA	Lake	HLN	N	Painted	F	A	554	148	154	111	57	9	7	145		D7110
178	2018-06-13	Hoop	HLCA	Lake	HLN	N	Painted	J	J	200	109	118	91	39	7	7	146		NO PIT
174	2018-06-13	Hoop	HLCA	Lake	HLN	N	Slider	M	A	666	155	169	135			18	15
175	2018-06-13	Hoop	HLCA	Lake	HLN	N	Slider	M	A	1280	185	209	162	80	35	21	16			VERY LARGE MALE
169	2018-06-13	Hoop	HLCA	Lake	HLN	N	Snapping	F	A	3300	180	225	195	103	75	89	70	CODE 12, M12056, MFT 3A, 149.440 MHZ, PP240-2247		GRAVID AND STUCK IN NET BY NECK-RECOVERD AFTER A FEW HOURS OF OBSERVATION
180	2018-06-13	Hoop	HLCA	Lake	HLN	N	Snapping	M	SA	2300	146	206	185	93	76	67	71		AA38	DISPLAYED
201	2018-06-14	Hoop	HLCA	Lake	HLN	N	Map	F	A	1794	215	237	192	85	19	14	1	M12060, 149.440 CODE 16, PP-240 2249		GRAVID MAP TURTLE Graptemys geographica
190	2018-06-14	Hoop	HLCA	Lake	HLN	R	Painted										119
184	2018-06-14	Hoop	HLCA	Lake	HLN	R	Painted										127
185	2018-06-14	Hoop	HLCA	Lake	HLN	R	Painted	M	SA								131
191	2018-06-14	Hoop	HLCA	Lake	HLN	R	Painted										132
181	2018-06-14	Hoop	HLCA	Lake	HLN	N	Painted	F	A	424	123	140	102	52	11	5	147		9DE3
182	2018-06-14	Hoop	HLCA	Lake	HLN	N	Painted	M	A	266	119	128	89	43	14	11	148		B115
186	2018-06-14	Hoop	HLCA	Lake	HLN	N	Painted	M	SA	214	104	114	85	37	11	10	149		6B95
194	2018-06-14	Hoop	HLCA	Lake	HLN	N	Painted	F	A	184	141	149	111	53	6	5	150		6CO7
195	2018-06-14	Hoop	HLCA	Lake	HLN	N	Painted	F	A	434	136	144	108	56	3	4	151		CGG5	NOTES INDICATED NO PIT- CONFUSING
196	2018-06-14	Hoop	HLCA	Lake	HLN	N	Painted	M	SA	174	100	107	84	33	10	8	152		B171
197	2018-06-14	Hoop	HLCA	Lake	HLN	N	Painted	M	A	292	126	132	96	41	9	11	153		23F2
198	2018-06-14	Hoop	HLCA	Lake	HLN	N	Painted	M	SA	174	97	107	82	39	9	10	154		7D05
199	2018-06-14	Hoop	HLCA	Lake	HLN	N	Painted	M	SA	144	91	99	79	35	6	9	155		NO PIT
200	2018-06-14	Hoop	HLCA	Lake	HLN	N	Slider	F	A	2000							17
189	2018-06-14	Hoop	HLCA	Lake	HLN	R	Snapping										47
188	2018-06-14	Hoop	HLCA	Lake	HLN	R	Snapping										57
183	2018-06-14	Hoop	HLCA	Lake	HLN	N	Snapping	M	SA	3600	183	247	213	105	98	82	72		AA5F
187	2018-06-14	Hoop	HLCA	Lake	HLN	N	Snapping	F	SA	4300	190	268	231	124	72	88	73		AA6E
192	2018-06-14	Hoop	HLCA	Lake	HLN	N	Snapping	F	SA	3700	191	266	229	106	79	88	74		AA51
193	2018-06-14	Hoop	HLCA	Lake	HLN	N	Snapping	M	SA	3200	174	242	208	112	87	74	75		AA35
203	2018-06-18	Hand	HLCA	Sandal	Sandal W	N	Snapping	M	A	10200	225	337	308		132	98	73		NO PIT
207	2018-06-19	Hoop	HLCA	Sandal	Sandal W	N	Painted	F	A	456	134	141	113	48	5	5	156		0DCC
204	2018-06-19	Hoop	HLCA	Sandal	Sandal W	N	Snapping	M	A	9500	237	348	289	134	139	104	74		AA2C
205	2018-06-19	Hoop	HLCA	Sandal	Sandal W	N	Snapping	F	SA	3940	181	261	219	108	74	84	75		AA24
206	2018-06-19	Hoop	HLCA	Sandal	Sandal W	N	Snapping	F	SA	3430	173	224	203	111	69	71	76		AA3D
210	2018-06-20	Hoop	HLCA	Sandal	Sandal W	N	Painted	M	A	250	110	129	97	38	18	19	157		7C90
211	2018-06-20	Hoop	HLCA	Sandal	Sandal W	R	Snapping										73
208	2018-06-20	Hoop	HLCA	Sandal	Sandal W	R	Snapping	F	SA								76
209	2018-06-20	Hoop	HLCA	Sandal	Sandal W	N	Snapping	F	SA	2540	158	206	191	98	60	77	87		AA32
212	2018-06-21	Hoop	HLCA	Sandal	Sandal W	R	Snapping										74
213	2018-06-21	Hoop	HLCA	Sandal	Sandal W	N	Snapping	M	SA	4000	173	254	211	97	99	78	78		AA3E
214	2018-06-21	Hoop	HLCA	Sandal	Sandal W	N	Snapping	F	SA	4440	196	264	221	113	77	84	79		AA25
218	2018-06-22	Hoop	HLCA	Sandal	Sandal W	N	Snapping	M	A	6850	202	287	248	117	128	86	77		AA2B
215	2018-06-22	Hoop	HLCA	Sandal	Sandal W	R	Snapping	F	SA								79
216	2018-06-22	Hoop	HLCA	Sandal	Sandal W	N	Snapping	F	SA	1860	138	189	166	95	47	64	80		AA54
217	2018-06-22	Hoop	HLCA	Sandal	Sandal W	R	Snapping										87
219	2018-06-25	Hoop	HLCA	Lake	HLSW	N	Painted	M	A	220	109	123	91	40	20	15	158		5931
241	2018-06-26	Hoop	HLCA	Lake	HLSW	R	Painted	M	A								158
221	2018-06-26	Hoop	HLCA	Lake	HLSW	N	Painted	M	SA	168	98	104	83	38	16	15	159		AA44
233	2018-06-26	Hoop	HLCA	Lake	HLSW	N	Painted	F	A	468	141	150	119	60	8	8	160		183D	AURAL abscess
234	2018-06-26	Hoop	HLCA	Lake	HLSW	N	Painted	F	A	500	140	155	117	59	9	8	161		8613
235	2018-06-26	Hoop	HLCA	Lake	HLSW	N	Painted	F	A	412	133	145	106	52	NA	7	162		9F4C	BLEEDING TAIL
236	2018-06-26	Hoop	HLCA	Lake	HLSW	N	Painted	F	A	498	151	161	117	53	10	9	163		7732	AURAL abscess
238	2018-06-26	Hoop	HLCA	Lake	HLSW	N	Painted	F	A	386	140	143	110	49	10	4	165		825A
239	2018-06-26	Hoop	HLCA	Lake	HLSW	N	Painted	M	A	188	107	114	89	39	11	14	166		8042
240	2018-06-26	Hoop	HLCA	Lake	HLSW	N	Painted	M	A	230	110	120	88	36	11	11	167		8B6D
237	2018-06-26	Hoop	HLCA	Lake	HLSW	N	Painted	F	A	504	143	153	111	59	9	9	168		8BDE
242	2018-06-26	Hoop	HLCA	Lake	HLSW	N	Painted	M	A	360	127	142	118	48	21	14	168		8AFB
243	2018-06-26	Hoop	HLCA	Lake	HLSW	N	Painted	M	A	202	106	115	87	35	12	9	169		19D6
244	2018-06-26	Hoop	HLCA	Lake	HLSW	N	Painted	F	A	329	125	133	104	50	10	8	170		7.40E+03
245	2018-06-26	Hoop	HLCA	Lake	HLSW	N	Painted	M	A	271	121	133	97	47	19	15	171		12A5
246	2018-06-26	Hoop	HLCA	Lake	HLSW	N	Painted	F	SA	258	118	121	89	41	6	4	172		8EA7
247	2018-06-26	Hoop	HLCA	Lake	HLSW	N	Painted	J	J	210	104	111	89	43	6	7	173		033B
248	2018-06-26	Hoop	HLCA	Lake	HLSW	N	Painted	M	A	262	116	128	94	44	19	12	174		1E7C
249	2018-06-26	Hoop	HLCA	Lake	HLSW	N	Painted	M	SA	184	105	114	86	38	15	13	175		1953
250	2018-06-26	Hoop	HLCA	Lake	HLSW	N	Painted	F	SA	177	101	109	85	41	6	7	176		1F51
251	2018-06-26	Hoop	HLCA	Lake	HLSW	N	Painted	M	SA	192	112	110	82	44	18	13	177		5EOO
252	2018-06-26	Hoop	HLCA	Lake	HLSW	R	Slider										12
253	2018-06-26	Hoop	HLCA	Lake	HLSW	N	Slider	F	A	2244	236	250	183	100	10	13	18
254	2018-06-26	Hoop	HLCA	Lake	HLSW	N	Slider	F	A	2079	217	236	179	67	5	9	19
255	2018-06-26	Hoop	HLCA	Lake	HLSW	N	Slider	F	A	1330	190	202	153	80	8	10	20
220	2018-06-26	Hoop	HLCA	Lake	HLSW	R	Snapping										57		WITH VHF/GPS ATTACHED	NO LONGER GRAVID
222	2018-06-26	Hoop	HLCA	Lake	HLSW	N	Snapping	M	SA	3500	188	246	215	107	59	86	81		791C
223	2018-06-26	Hoop	HLCA	Lake	HLSW	N	Snapping	F	A	4900	207	274	227	131	64	105	82		53DE
224	2018-06-26	Hoop	HLCA	Lake	HLSW	N	Snapping	F	A	7000	232	300	260	147	73	109	83		2592
225	2018-06-26	Hoop	HLCA	Lake	HLSW	N	Snapping	M	SA	2400	154	205	183	91	73	73	84		840B	DISPLAYED
226	2018-06-26	Hoop	HLCA	Lake	HLSW	N	Snapping	F	A	9300	266	333	323	150	50	124	85		AA61	DAMAGED SHELL
227	2018-06-26	Hoop	HLCA	Lake	HLSW	N	Snapping	M	A	10000	257	370	303	139	155	112	86		AA3B
228	2018-06-26	Hoop	HLCA	Lake	HLSW	N	Snapping	M	A	14000	299	420	373	169	170	126	87		AA40
229	2018-06-26	Hoop	HLCA	Lake	HLSW	N	Snapping	M	SA	3500	178	245	206	99	85	84	88		AA4E	DISPLAYED
230	2018-06-26	Hoop	HLCA	Lake	HLSW	N	Snapping	F	SA	3200	182	244	206	108	60	84	89		AA21
231	2018-06-26	Hoop	HLCA	Lake	HLSW	N	Snapping	F	SA	5900	208	271	231	117	82	96	90		AA14
232	2018-06-26	Hoop	HLCA	Lake	HLSW	N	Snapping	M	A	7400	209	308	264	118	119	103	91		AA56
265	2018-06-27	Hoop	HLCA	Lake	HLSW	N	Painted	M	A	287	128	140	100	45	10	12	178		7189
266	2018-06-27	Hoop	HLCA	Lake	HLSW	N	Painted	F	A	572	178	160	120	54	5	5	179		A32C
267	2018-06-27	Hoop	HLCA	Lake	HLSW	N	Painted	F	A	410	138	150	110	58	9	7	180		81OE
268	2018-06-27	Hoop	HLCA	Lake	HLSW	N	Painted	M	SA	218	105	114	88	38	13	9	181		1B53
269	2018-06-27	Hoop	HLCA	Lake	HLSW	N	Painted	F	A	479	145	153	118	52	8	7	182		7DA6	AURAL ABCESS
270	2018-06-27	Hoop	HLCA	Lake	HLSW	N	Painted	M	A	335	131	138	108	45	17	18	183		5A11
271	2018-06-27	Hoop	HLCA	Lake	HLSW	N	Painted	F	SA	308	129	139	104	44	4	8	184		72F7
272	2018-06-27	Hoop	HLCA	Lake	HLSW	N	Painted	M	SA	168	100	109	84	40	15	19	185		5426
273	2018-06-27	Hoop	HLCA	Lake	HLSW	N	Painted	F	SA	273	116	123	95	49	8	5	186		2.00E+76
274	2018-06-27	Hoop	HLCA	Lake	HLSW	N	Painted	M	SA	186	104	111	83	6	9	10	187		834C
275	2018-06-27	Hoop	HLCA	Lake	HLSW	N	Painted	M	A	290	117	129	100	44	17	14	188		7.00E+26
276	2018-06-27	Hoop	HLCA	Lake	HLSW	N	Painted	M	SA	207	109	119	90	39	18	18	189		6I96
259	2018-06-27	Hoop	HLCA	Lake	HLSW	R	Slider										12
262	2018-06-27	Hoop	HLCA	Lake	HLSW	R	Snapping										51			NO LONGER GRAVID
256	2018-06-27	Hoop	HLCA	Lake	HLSW	R	Snapping										83
257	2018-06-27	Hoop	HLCA	Lake	HLSW	N	Snapping	M	A	5100	201	270	237	115	113	93	92		AA1A
258	2018-06-27	Hoop	HLCA	Lake	HLSW	N	Snapping	M	A	6800	189	280	232	122	124	90	93		AA23
260	2018-06-27	Hoop	HLCA	Lake	HLSW	N	Snapping	F	A	6800	232	299	263	133	90	114	94		AA13
261	2018-06-27	Hoop	HLCA	Lake	HLSW	N	Snapping	M	SA	3600	184	252	221	108	96	88	95		AA39
263	2018-06-27	Hoop	HLCA	Lake	HLSW	N	Snapping	F	A	7500	239	318	245	138	92	113	96		AA28
264	2018-06-27	Hoop	HLCA	Lake	HLSW	N	Snapping	M	A	8000	235	324	265	143	83	111	97		AA1F
288	2018-06-28	Hoop	HLCA	Lake	HLSW	R	Painted										158
280	2018-06-28	Hoop	HLCA	Lake	HLSW	R	Painted	F									163
283	2018-06-28	Hoop	HLCA	Lake	HLSW	R	Painted	M									169
287	2018-06-28	Hoop	HLCA	Lake	HLSW	R	Painted										171
284	2018-06-28	Hoop	HLCA	Lake	HLSW	R	Painted	F									189
281	2018-06-28	Hoop	HLCA	Lake	HLSW	N	Painted	F	A	512	147	153	123	53	11	8	190		AA12
282	2018-06-28	Hoop	HLCA	Lake	HLSW	N	Painted	F	A	508	150	154	115	60	8	7	191		AA16
285	2018-06-28	Hoop	HLCA	Lake	HLSW	N	Painted	F	SA	256	111	122	94	45	9	9	192		AA15
286	2018-06-28	Hoop	HLCA	Lake	HLSW	N	Painted	M	SA	172	100	106	83	34	14	8	193		AA34
289	2018-06-28	Hand	HLCA	Lake	HLR	N	Painted	M	A	268	121	132	94	43	16	12	200		836C	NOTCHED OUT OF ORDER
278	2018-06-28	Hoop	HLCA	Lake	HLSW	R	Slider										12
279	2018-06-28	Hoop	HLCA	Lake	HLSW	R	Snapping	F	A	7000	226	304	261	135	69	109	83		2592
277	2018-06-28	Hoop	HLCA	Lake	HLSW	N	Snapping	F	A	5200	204	286	240	131	77	97	98		AA11
290	2018-07-04	Hoop	HLCA	Lake	HLE	R	Map	F	A								1			W TRACKERS
291	2018-07-04	Hoop	HLCA	Lake	HLE	R	Painted										114
292	2018-07-04	Hoop	HLCA	Lake	HLE	R	Painted										163
293	2018-07-04	Hoop	HLCA	Lake	HLE	N	Painted	F	A	478	131	140	118	48	6	7	194		97F2	HOLE UNDER CHIN
294	2018-07-04	Hoop	HLCA	Lake	HLE	N	Painted	M	A	284	112	128	95	47	19	16	195		9D68
295	2018-07-04	Hoop	HLCA	Lake	HLE	N	Painted	J	J	186	110	115	90	37	3	8	196		NO TAG	TOO SMALL TO TAG
296	2018-07-04	Hoop	HLCA	Lake	HLE	N	Painted	M	A	208	107	118	85	90	14	12	197		7FBA
297	2018-07-04	Hoop	HLCA	Lake	HLE	N	Painted	F	A	272	123	130	99	45	9	9	198		AC6B
298	2018-07-04	Hoop	HLCA	Lake	HLE	N	Painted	J	J	174	103	109	85	40	4	6	199		2B91
299	2018-07-04	Hoop	HLCA	Lake	HLE	N	Painted	F	A	292	123	131	101	46	9	5	201		8D2D
300	2018-07-04	Hoop	HLCA	Lake	HLE	N	Painted	M	SA	188	102	110	88	37	14	12	202		6A7B
301	2018-07-04	Hoop	HLCA	Lake	HLE	N	Painted	F	A	252	119	126	98	45	7	8	203		D7601
314	2018-07-04	Hoop	HLCA	Lake	HLE	N	Painted	M	A	228	115	129	94	39	15	15	204		1835
315	2018-07-04	Hoop	HLCA	Lake	HLE	N	Painted	J	J	144	92	100	83	36	11	8	205		89AD
316	2018-07-04	Hoop	HLCA	Lake	HLE	N	Painted	F	SA	308	120	127	100	49	7	8	206		880A
320	2018-07-04	Hoop	HLCA	Lake	HLE	N	Painted	F	A	566	158	165	125	59	5	9	207		2C66
321	2018-07-04	Hoop	HLCA	Lake	HLE	N	Painted	F	A	536	153	160	119	54	8	7	208		7A44	STUBBY TAIL
303	2018-07-04	Hoop	HLCA	Lake	HLE	R	Snapping										45
302	2018-07-04	Hoop	HLCA	Lake	HLE	R	Snapping										46			W TRACKERS
304	2018-07-04	Hoop	HLCA	Lake	HLE	R	Snapping										54		AA4C
305	2018-07-04	Hoop	HLCA	Lake	HLE	N	Snapping	F	SA	2400	155	215	191	99	51	70	99		2DF2
306	2018-07-04	Hoop	HLCA	Lake	HLE	N	Snapping	F	A	6200	230	299	259	124	59	115	100		05-Feb
310	2018-07-04	Hoop	HLCA	Lake	HLE	N	Snapping	M	A	12200	267	368	321	149	164	123	101		AA43
311	2018-07-04	Hoop	HLCA	Lake	HLE	N	Snapping	F	A	10800	283	374	302	164	95	135	102		AA1D
312	2018-07-04	Hoop	HLCA	Lake	HLE	N	Snapping	F	A	5300	208	287	230	119	59	101	103		AA5C
313	2018-07-04	Hoop	HLCA	Lake	HLE	R	Snapping	F	A	7100	249	318	277	137	70	116	104		AA22 AND AA3C	THIS WAS A RECAP THAT WE THOUGHT WAS NEW (USED TO BE #59)
317	2018-07-04	Hoop	HLCA	Lake	HLE	N	Snapping	J	J	1600	135	183	152	81	61	59	105			PIT TAG INSERTED BUT NOT RECORDED
318	2018-07-04	Hoop	HLCA	Lake	HLE	N	Snapping	M	A	13800	278	406	352	158	178	135	106		AA5D
319	2018-07-04	Hoop	HLCA	Lake	HLE	N	Snapping	M	A	7600	228	326	289	126	136	119	107		AA26
307	2018-07-04	Hoop	HLCA	Lake	HLE	R	Snapping												AA6B
308	2018-07-04	Hoop	HLCA	Lake	HLE	R	Snapping												AA57	LEG INJURY
309	2018-07-04	Hoop	HLCA	Lake	HLE	R	Snapping												AA1C
325	2018-07-05	Hoop	HLCA	Lake	HLE	R	Map										1			REMOVED GPS
335	2018-07-05	Hoop	HLCA	Lake	HLE	R	Painted										154		7D05
329	2018-07-05	Hoop	HLCA	Lake	HLE	R	Painted										195
328	2018-07-05	Hoop	HLCA	Lake	HLE	R	Painted										197
330	2018-07-05	Hoop	HLCA	Lake	HLE	R	Painted										200
333	2018-07-05	Hoop	HLCA	Lake	HLE	N	Painted	M	A	296	120	128	100	41	12	9	209		68F8
334	2018-07-05	Hoop	HLCA	Lake	HLE	N	Painted	F	A	400	134	143	100	48	6	4	210		2673
336	2018-07-05	Hoop	HLCA	Lake	HLE	N	Painted	J	J	176	94	103	85	35	6	3	211		63D4
337	2018-07-05	Hoop	HLCA	Lake	HLE	N	Painted	F	A	676	154	170	130	60	7	8	212		84B5	STUB TAIL
338	2018-07-05	Hoop	HLCA	Lake	HLE	N	Painted	F	A	373	130	139	106	49	9	4	213		2229
339	2018-07-05	Hoop	HLCA	Lake	HLE	N	Painted	F	A	364	128	133	96	47	9	4	214		8C10
340	2018-07-05	Hoop	HLCA	Lake	HLE	N	Painted	M	SA	166	94	102	81	36	8	10	215		B199
331	2018-07-05	Hoop	HLCA	Lake	HLE	R	Snapping										39
322	2018-07-05	Hoop	HLCA	Lake	HLE	R	Snapping										40
323	2018-07-05	Hoop	HLCA	Lake	HLE	R	Snapping										45
324	2018-07-05	Hoop	HLCA	Lake	HLE	R	Snapping										47
326	2018-07-05	Hoop	HLCA	Lake	HLE	R	Snapping										97
327	2018-07-05	Hoop	HLCA	Lake	HLE	R	Snapping										103
332	2018-07-05	Hoop	HLCA	Lake	HLE	N	Snapping	F	SA	5040	198	275	220	119	66	91	108		83A8
341	2018-07-06	Hoop	HLCA	Lake	HLE	R	Map										1
347	2018-07-06	Hoop	HLCA	Lake	HLE	R	Painted										133
342	2018-07-06	Hoop	HLCA	Lake	HLE	R	Painted										160
353	2018-07-06	Hoop	HLCA	Lake	HLE	R	Painted										175
343	2018-07-06	Hoop	HLCA	Lake	HLE	R	Painted										197
345	2018-07-06	Hoop	HLCA	Lake	HLE	R	Painted										203
344	2018-07-06	Hoop	HLCA	Lake	HLE	R	Painted										209
346	2018-07-06	Hoop	HLCA	Lake	HLE	R	Painted										213
351	2018-07-06	Hoop	HLCA	Lake	HLE	N	Painted	J	J	190	102	111	92	41	8	8	216		849C
355	2018-07-06	Hoop	HLCA	Lake	HLE	N	Painted	J	J	228	112	120	94	43	6	8	217		7CD9
354	2018-07-06	Hoop	HLCA	Lake	HLE	N	Painted	F	A	316	122	136	102	49	10	8	218		6A81
349	2018-07-06	Hoop	HLCA	Lake	HLE	R	Slider										17
348	2018-07-06	Hoop	HLCA	Lake	HLE	R	Slider										12
350	2018-07-06	Hoop	HLCA	Lake	HLE	R	Slider										19
352	2018-07-06	Hoop	HLCA	Lake	HLE	R	Snapping										47
356	2018-07-06	Hoop	HLCA	Lake	HLE	N	Snapping	J	J	1124	132	170	140	75	51	58	109		3949
357	2018-07-06	Hoop	HLCA	Lake	HLE	N	Snapping	M	A	6080	222	300	253	124	116	115	110		0AC4	DISPLAYED
358	2018-07-10	Hoop	HLCA	Fen/Heart	Fenwick	N	Snapping	F	SA	3960	197	249	220	112	70	80	111		6330
359	2018-07-10	Hoop	HLCA	Fen/Heart	Fenwick	N	Snapping	F	SA	3830	177	248	208	108	73	82	112		5572
360	2018-07-10	Hoop	HLCA	Fen/Heart	Fenwick	N	Snapping	M	A	7550	218	314	253	132	123	101	113		69FB
361	2018-07-10	Hoop	HLCA	Fen/Heart	H.VIEW	N	Snapping	F	SA	3880	183	246	219	110	55	84	114		7E1O
362	2018-07-10	Hoop	HLCA	Fen/Heart	H.VIEW	N	Snapping	M	A	11800	261	375	315	147	146	119	115		00F1
393	2018-07-11	Hoop	HLCA	Lake	HLE	R	Painted										214
364	2018-07-11	Hoop	HLCA	Fen/Heart	H.VIEW	R	Snapping	M									115
363	2018-07-11	Hoop	HLCA	Fen/Heart	H.VIEW	N	Snapping	F	A	4800	194	277	219	123	70	93	116	MFT-3A-M12058, PP-240 2244	94EA	ENLARGED CLOACA- JUST LAID?
377	2018-07-12	Hoop	HLCA	Pres/Cres	PRES.CNTR	N	Painted	F	SA	222	107	112	88	39	3	3	219		2CF5
378	2018-07-12	Hoop	HLCA	Pres/Cres	PRES.CNTR	N	Painted	F	A	514	142	154	118	59	7	7	220		6275
379	2018-07-12	Hoop	HLCA	Pres/Cres	PRES.CNTR	N	Painted	F	A	396	129	136	105	48	6	4	221		867F
380	2018-07-12	Hoop	HLCA	Pres/Cres	PRES.CNTR	N	Painted	F	A	464	142	149	115	55	9	9	222		903E
381	2018-07-12	Hoop	HLCA	Pres/Cres	PRES.CNTR	N	Painted	M	A	278	113	125	96	41	12	9	223		1B82
382	2018-07-12	Hoop	HLCA	Pres/Cres	PRES.CNTR	N	Painted	J	J	190	102	105	88	40	4	6	224		89FD
383	2018-07-12	Hoop	HLCA	Pres/Cres	PRES.CNTR	N	Painted	M	A	236	109	119	94	37	18	8	225		B3E3
384	2018-07-12	Hoop	HLCA	Pres/Cres	PRES.CNTR	N	Painted	M	A	272	119	128	95	42	12	12	226		5AB5
385	2018-07-12	Hoop	HLCA	Pres/Cres	PRES.CNTR	N	Painted	M	A	236	110	114	95	35	15	9	227		1BF7
386	2018-07-12	Hoop	HLCA	Pres/Cres	PRES.CNTR	N	Painted	J	J	212	117	111	90	40	3	5	228		2387
376	2018-07-12	Hoop	HLCA	Pres/Cres	PRES.CNTR	N	Painted	F	A	386	135	142	114	49	8	7	400		661D	SEVERE SHELL DAMAGE- LEFT REAR
365	2018-07-12	Hoop	HLCA	Fen/Heart	H.VIEW	N	Snapping	M	SA	2140	139	209	170	91	56	69	117		217B	DISPLAYED
366	2018-07-12	Hoop	HLCA	Pres/Cres	PRES.CNTR	N	Snapping	M	A	7980	211	308	272	134	138	98	118		7.40E+10
367	2018-07-12	Hoop	HLCA	Pres/Cres	PRES.CNTR	N	Snapping	M	A	5570	211	302	250	121	103	103	119		7932	DISPLAYED
368	2018-07-12	Hoop	HLCA	Pres/Cres	PRES.CNTR	N	Snapping	F	SA	4160	190	258	215	110	66	83	120		7095	STUBBY TAIL
369	2018-07-12	Hoop	HLCA	Pres/Cres	PRES.CNTR	N	Snapping	M	SA	2320	149	198	174	95	69	68	121		IC94	DISPLAYED
370	2018-07-12	Hoop	HLCA	Pres/Cres	PRES.CNTR	N	Snapping	F	A	7379	241	322	286	149	83	112	122		544A	PUNCTURED CARAPACE
371	2018-07-12	Hoop	HLCA	Pres/Cres	PRES.CNTR	N	Snapping	F	A	5350	211	283	242	126	80	99	123		6121	PUNCTURED CARAPACE
372	2018-07-12	Hoop	HLCA	Pres/Cres	PRES.CNTR	N	Snapping	F	SA	3730	175	254	196	111	63	86	124		5A7F
373	2018-07-12	Hoop	HLCA	Pres/Cres	PRES.CNTR	N	Snapping	F	SA	2300	155	204	174	101	58	72	125		7913
374	2018-07-12	Hoop	HLCA	Pres/Cres	PRES.CNTR	N	Snapping	M	A	4690	197	265	222	120	95	91	126		13FB
375	2018-07-12	Hoop	HLCA	Pres/Cres	PRES.CNTR	N	Snapping	F	SA	4580	194	277	125	116	56	89	127		8C4C	CRANIAL ABCESS
391	2018-07-13	Hoop	HLCA	Pres/Cres	PRES.CNTR	N	Painted	F	A	316	122	126	99	39	4	4	229		5C19
392	2018-07-13	Hoop	HLCA	Pres/Cres	PRES.CNTR	N	Painted	F	A	362	130	139	110	50	2	3	230		634D
388	2018-07-13	Hoop	HLCA	Pres/Cres	PRES.CNTR	R	Snapping	F									122		544A
387	2018-07-13	Hoop	HLCA	Fen/Heart	H.VIEW	N	Snapping	F	A	5200	203	271	238	118	65	93	128		8CF3
389	2018-07-13	Hoop	HLCA	Pres/Cres	PRES.CNTR	N	Snapping	M	A	6270	216	293	241	124	123	100	129		FE46
390	2018-07-13	Hoop	HLCA	Pres/Cres	PRES.CNTR	N	Snapping	J	J	1710	126	185	155	80	69	64	130		7D31
399	2018-07-17	Hoop	HLCA	Lake	HLN	R	Painted										116
394	2018-07-17	Hoop	HLCA	Pres/Cres	Crescent	N	Snapping	F	SA	2350	159	208	176	92	52	76	131		7F47
395	2018-07-17	Hoop	HLCA	Pres/Cres	Crescent	N	Snapping	F	SA	1700	142	186	164	90	38	68	132		1695
396	2018-07-17	Hoop	HLCA	Pres/Cres	Crescent	N	Snapping	M	A	5950	202	289	256	119	111	91	133		7392
397	2018-07-17	Hoop	HLCA	Pres/Cres	PRES.CNTR	N	Snapping	M	A	5350	196	271	237	120	110	86	134		5210	DISPLAYED
398	2018-07-17	Hoop	HLCA	Pres/Cres	PRES.CNTR	N	Snapping	J	J	281	79	99	81	51	27	31	135
400	2018-07-18	Hoop	HLCA	Pres/Cres	PRES.CNTR	R	Snapping										119
401	2018-07-18	Hoop	HLCA	Pres/Cres	PRES.CNTR	N	Snapping	M	SA	2280	145	206	173	92	63	67	136
402	2018-07-18	Hoop	HLCA	Pres/Cres	PRES.CNTR	N	Snapping	J	J	950	118	155	132	70	36	52	137		OC8D
403	2018-07-19	Hoop	HLCA	Pres/Cres	PRES.CNTR	N	Painted	F	A	464	141	150	108	52	4	5	213		9A36
404	2018-07-19	Hoop	HLCA	Pres/Cres	PRES.CNTR	N	Painted	F	A	354	130	136	104	50	3	4	232		834E
405	2018-07-19	Hoop	HLCA	Pres/Cres	PRES.CNTR	N	Snapping	M	SA	1060	114	155	137	72	42	51	138		6F7C	DISPLAYED
413	2018-07-23	Hoop	HLCA	Lake	HLN	R	Painted	M	A								126		74B1
414	2018-07-23	Hoop	HLCA	Lake	HLN	R	Painted	M	A								132		6409
415	2018-07-23	Hoop	HLCA	Lake	HLN	N	Painted	F	A	292	110	124	90	44	9	4	240		2CD4
416	2018-07-23	Hoop	HLCA	Lake	HLN	N	Painted	M	A	272	118	127	95	41	12	9	241		B3D5
412	2018-07-23	Hoop	HLCA	Lake	HLN	R	Slider	F									17
409	2018-07-23	Hoop	HLCA	Lake	HLN	R	Snapping										37		AA6B
408	2018-07-23	Hoop	HLCA	Lake	HLN	R	Snapping										54		AA4C
410	2018-07-23	Hoop	HLCA	Lake	HLN	R	Snapping										56		AA69
407	2018-07-23	Hoop	HLCA	Lake	HLN	R	Snapping										57		88234	TRANSMITTER REMOVED
411	2018-07-23	Hoop	HLCA	Lake	HLN	R	Snapping										61		AA49
406	2018-07-23	Hoop	HLCA	lake	RAINER	N	Snapping	F	SA	2300	153	207	166	91	41	74	139		5EF5
417	2018-07-24	Hoop	HLCA	Lake	HLN	R	Painted										143		186F
418	2018-07-24	Hoop	HLCA	Lake	HLN	N	Painted	F	A	416	128	140	108	51	2	4	242		8.00E+83
419	2018-07-24	Hoop	HLCA	Lake	HLN	N	Painted	F	A	512	146	152	112	56	4	5	243		90D9
420	2018-07-24	Hoop	HLCA	Lake	HLN	N	Painted	F	A	344	127	135	103	48	5	4	244		1A74
421	2018-07-24	Hoop	HLCA	Lake	HLN	N	Painted	F	SA	248	110	115	94	43	6	3	245		6EC9
430	2018-07-24	Hoop	HLCA	Lake	HLN	N	Painted	F	SA	234	111	118	90	38	4	3	246		A153
422	2018-07-24	Hoop	HLCA	Lake	HLN	R	Slider										18
423	2018-07-24	Hoop	HLCA	Lake	HLN	R	Slider										19
424	2018-07-24	Hoop	HLCA	Lake	HLN	R	Snapping										42		AA58
427	2018-07-24	Hoop	HLCA	Lake	HLN	R	Snapping										42		AA27
425	2018-07-24	Hoop	HLCA	Lake	HLN	R	Snapping										64		AA33
426	2018-07-24	Hoop	HLCA	Lake	HLN	R	Snapping										100		05-Feb
428	2018-07-24	Hoop	HLCA	Lake	HLN	N	Snapping	F	SA	2200	150	196	172	96	67	77	140		8C0B
429	2018-07-24	Hoop	HLCA	Lake	HLN	N	Snapping	M	SA	3400	172	245	197	101	91	79	141		1679	DISPLAYED
431	2018-07-24	Hoop	HLCA	Lake	RAINER	N	Snapping	M	SA	1874	141	196	165	90	60	67	142		55A2	DISPLAYED
	2019-05-09	Hoop	HLCA	Lake	HLN	N	Musk	F	A	171	76	94	72	44			1			It weighted 171g, carapace SCL (straight carapace length) 94 mm, plastron 76 mm, carapace width 72 mm, body depth of 44 mm.Based on field assessed growth rings, it looked to be 5 or 6 yrs old, but the literature tells us that stinkpots with SCL longer than 80mm are older than 10 years. It was a female (based on the short tail length and lack of terminal spike on tail). Confirming this field asses…
